# Supplementary material for: Facile fabrication of α-FeOOH nanorod/RGO composite: a robust photocatalyst for reduction of Cr(vi) under visible light irradiation
Source: Royal Society of Chemistry journal article supplement (doi:10.1039/c4ta00931b), 2014-01-01
Supplement: c4ta00931b1.pdf [file c4ta00931b1.pdf]

## **SUPPLEMENTARY INFORMATION**

**Facile fabrication of  $\alpha$ -FeOOH nanorod/RGO composite: A robust photocatalyst for  
reduction of Cr (VI) under visible light irradiation**

**Deepak kumar Padhi and K. M. Parida\***

*Colloids and Materials Chemistry Department, CSIR-Institute of Minerals and  
Materials Technology, Bhubaneswar – 751 013, Orissa, INDIA*

\* Corresponding author

E-mail: paridakulamani@yahoo.com

Tel. No. +91-674-2379425

Fax. +91-674-2581637

---

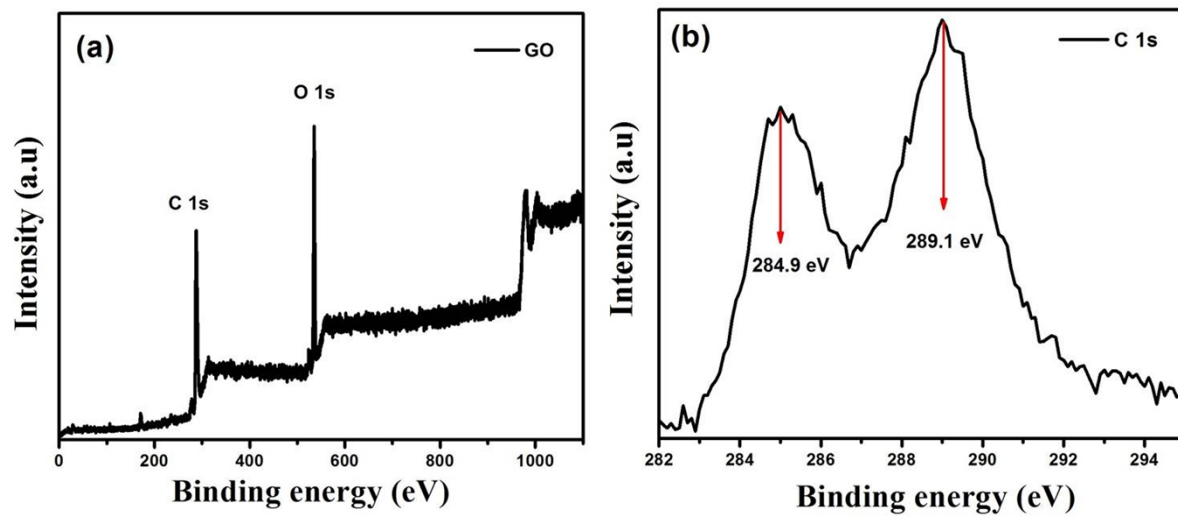

**Figure S1. XPS spectra of GO : (a) Full survey and (b) Survey for C 1s.**
